# Supplementary material for: Genome-Wide Population Structure Analysis and Genetic Diversity Detection of Four Chinese Indigenous Duck Breeds from Fujian Province
Source: MDPI journal article supplement (doi:10.3390/ani12172302), 2022-09-05
Supplement: s1 [file s1]

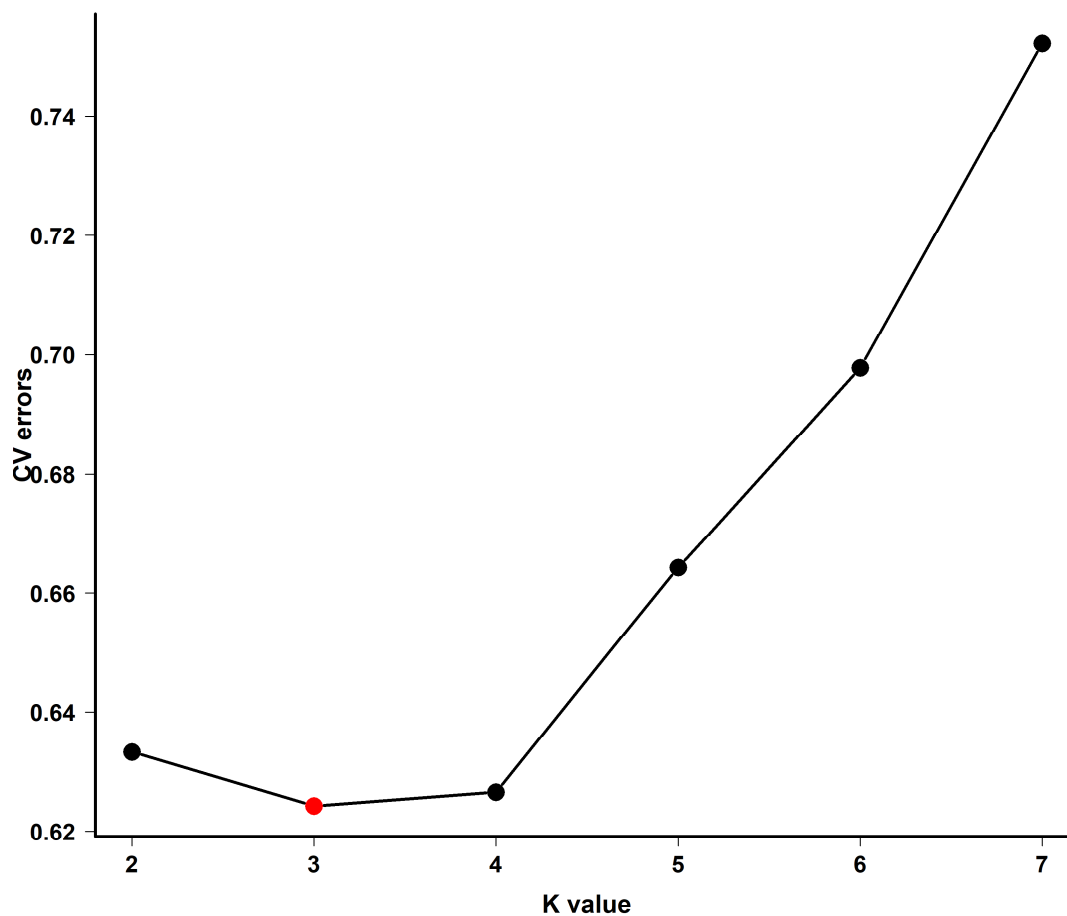

**Figure S1.** Cross-validation error line charts of duck breeds. The optimal number of assumed ancestors was three (K=3), at which point the error reached the lowest level.

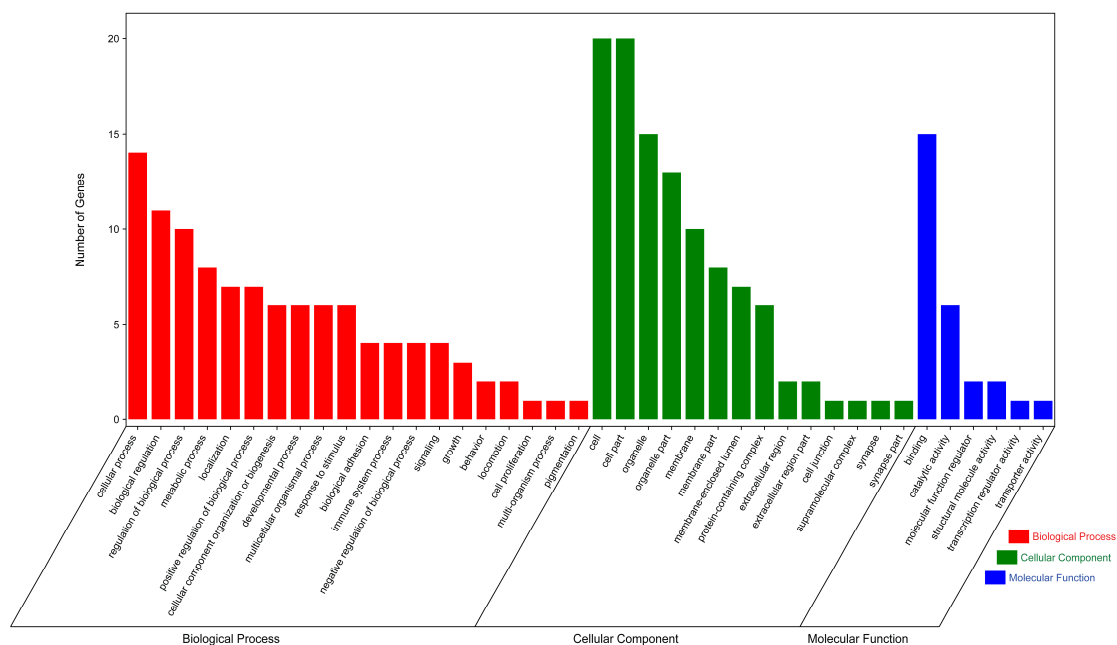

**Figure S2.** GO enrichment analysis of candidate genes in the ROH islands. The red, green, and

blue parts represent biological process, cellular component, and molecular function, respectively.

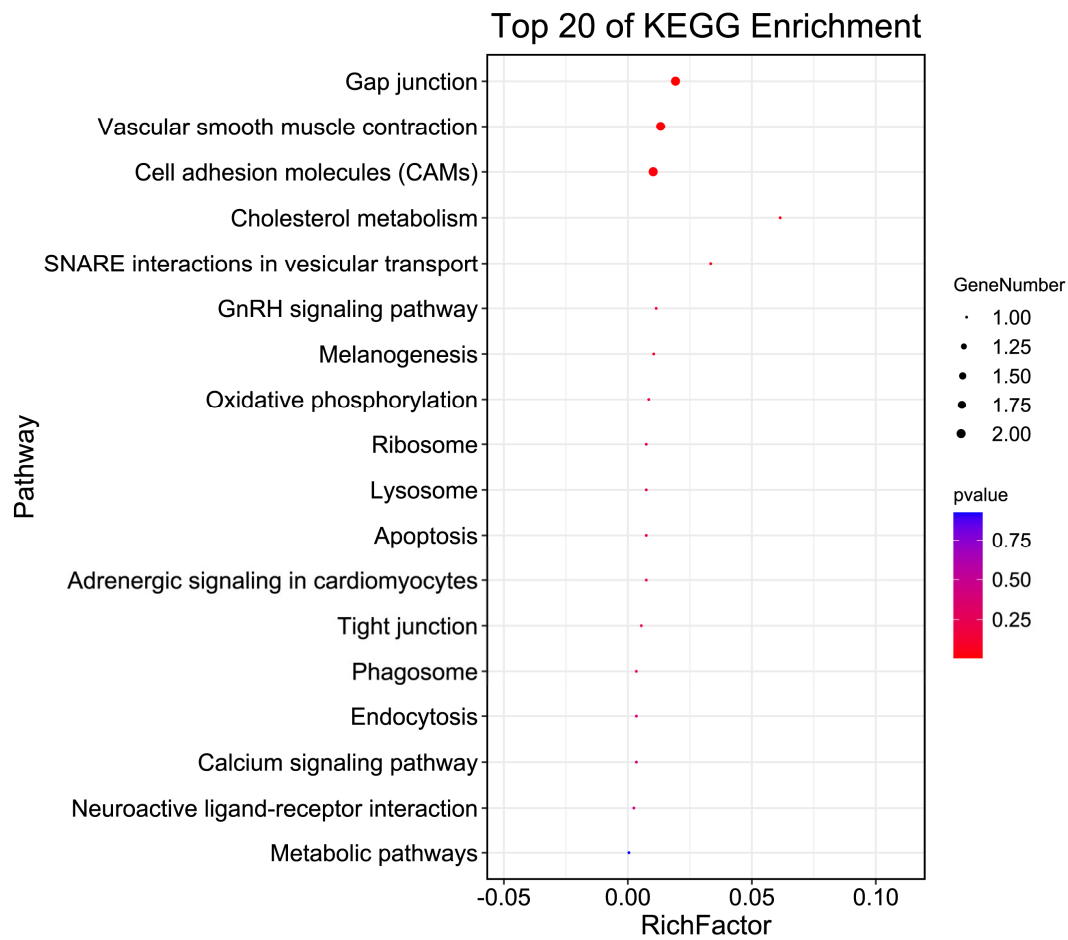

**Figure S3.** KEGG pathway enrichment analysis of candidate genes in the ROH islands.
